# Supplementary material for: Determining the impact of postoperative complications in neurosurgery based on simulated longitudinal smartphone app-based assessment
Source: Springer Nature journal article supplement (doi:10.1007/s00701-021-04967-0), 2021-08-21

**Description:**

A Google Forms ® print of the questionnaire we sent to our participants. Questions were translated to English for the purpose of this publication.

Article title: Determining the impact of postoperative complications in neurosurgery based on longitudinal smartphone app-based assessment

Journal: Acta Neurochirurgica

Authors: Comfort LD (1,2), Neidert MC (3), Bozinov O (3), Regli L (1,2), Stienen MN (3)

**Affiliations:**

(1) Department of Neurosurgery, University Hospital Zurich, Zurich, Switzerland

(2) Clinical Neuroscience Center, University of Zurich, Zurich, Switzerland

(3) Department of Neurosurgery, Cantonal Hospital St. Gallen, St. Gallen, Switzerland

**Corresponding Author:**

Lion D. Comfort, Department of Neurosurgery, University Hospital Zurich  
comfortlion@gmail.com

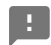

# Post OP Tracker Questionnaire

\*Required

Email adress: \*

Your answer

What is your patient code?

Your answer

How old are you? \*

Your answer

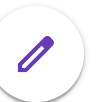

What is your gender? \*

male

female

What is your profession? \*

Your answer

How good do you rate the app? \*

very good

good

medium

bad

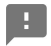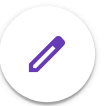

How regularly did you enter your patient inputs? \*

- always
- mostly
- rarely
- never

How high was the temporal effort of entering the patient inputs? \*

- low, < 5 seconds
- medium, 5 - 10 seconds
- high, 10 - 20 seconds
- very high, > 20 seconds

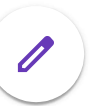

How user-friendly did you perceive the app in general? \*

- very user-friendly
- somewhat user-friendly
- little user-friendly
- not user-friendly

Did the notification appear regularly and at the desired time? \*

- yes
- no
- Other:

Did you experience any technical issues when using the app? \*

- no
- yes, minor
- yes, major

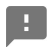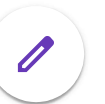

Please specify the technical issues if you answered the last question with 'yes':

Your answer

How good do you rate the design of the app? \*

- very good
- good
- moderate
- not good

For health care professionals: can you imagine your patients using this app in the future?

- definitely
- possibly
- rather not
- never



Can you imagine using this app as a patient? \*

- definitely
- possibly
- rather not
- never

Do you have further suggestions or remarks? If yes, please enter them here:

Your answer

Submit

Never submit passwords through Google Forms.

This content is neither created nor endorsed by Google. [Report Abuse](#) - [Terms of Service](#) - [Privacy Policy](#).

Google Forms

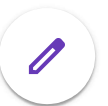

Supplement: MOESM1 [file 19587806]
